# Supplementary material for: Associations of Mediterranean Diet and a Posteriori Derived Dietary Patterns with Breast and Lung Cancer Risk: A Case-Control Study
Source: PubMed Central journal article supplement (PMC5946255; doi:10.3390/nu10040470), 2018-04-11
Supplement: nutrients-10-00470-s001.pdf [file nutrients-10-00470-s001.pdf]

Table S1. The mean (95%CI) of the frequency of food consumption by dietary patterns for cancer-control sample (times/day)

| Food groups <sup>#</sup>                              | Total             | Dietary Patterns   |                   |                   |                        |                   |                   |                                                  |                   |                   |                      |                   |                    |
|-------------------------------------------------------|-------------------|--------------------|-------------------|-------------------|------------------------|-------------------|-------------------|--------------------------------------------------|-------------------|-------------------|----------------------|-------------------|--------------------|
|                                                       |                   | 'Prudent' tertiles |                   |                   | 'Non-Healthy' tertiles |                   |                   | 'Dressings and sweetened-low-fat dairy' tertiles |                   |                   | 'Polish-aMED' levels |                   |                    |
|                                                       |                   | bottom             | middle            | upper             | bottom                 | middle            | upper             | bottom                                           | middle            | upper             | low                  | average           | high               |
| Size (n)                                              | 560               | 186                | 188               | 186               | 187                    | 187               | 186               | 186                                              | 187               | 187               | 113                  | 278               | 169                |
| Sugar, honey and sweets                               | 2.1<br>(2.0; 2.2) | 2.1<br>(1.9; 2.3)  | 2.1<br>(1.9; 2.3) | 2.0<br>(1.8; 2.2) | 1.3<br>(1.2; 1.5)      | 1.9<br>(1.7; 2.0) | 3.0<br>(2.8; 3.2) | 1.9<br>(1.8; 2.1)                                | 2.1<br>(1.9; 2.2) | 2.2<br>(2.0; 2.4) | 2.2<br>(2.0; 2.5)    | 2.1<br>(1.9; 2.2) | 1.9<br>(1.7; 2.1)  |
| Red and processed meats                               | 1.5<br>(1.4; 1.6) | 1.3<br>(1.2; 1.5)  | 1.5<br>(1.4; 1.6) | 1.6<br>(1.5; 1.7) | 1.0<br>(0.9; 1.1)      | 1.5<br>(1.4; 1.6) | 2.0<br>(1.9; 2.1) | 1.5<br>(1.4; 1.7)                                | 1.4<br>(1.2; 1.5) | 1.5<br>(1.4; 1.7) | 1.5<br>(1.3; 1.6)    | 1.6<br>(1.5; 1.7) | 1.2<br>(1.1; 1.4)  |
| Animal fats                                           | 1.2<br>(1.1; 1.3) | 1.0<br>(0.9; 1.2)  | 1.2<br>(1.1; 1.4) | 1.3<br>(1.2; 1.4) | 0.7<br>(0.6; 0.8)      | 1.1<br>(1.0; 1.2) | 1.7<br>(1.6; 1.9) | 1.9<br>(1.8; 2.0)                                | 1.1<br>(1.0; 1.2) | 0.5<br>(0.5; 0.6) | 1.2<br>(1.1; 1.4)    | 1.3<br>(1.2; 1.4) | 0.9<br>(0.8; ) 1.0 |
| Milk, fermented milk drinks and curd cheese           | 1.0<br>(0.9; 1.0) | 0.6<br>(0.5; 0.6)  | 1.0<br>(0.9; 1.1) | 1.4<br>(1.3; 1.5) | 0.9<br>(0.9; 1.0)      | 1.0<br>(0.9; 1.1) | 1.0<br>(0.9; 1.1) | 0.8<br>(0.7; 0.9)                                | 1.0<br>(0.9; 1.1) | 1.2<br>(1.1; 1.3) | 0.7<br>(0.6; 0.8)    | 1.0<br>(0.9; 1.0) | 1.2<br>(1.1; 1.3)  |
| Refined grains                                        | 1.0<br>(1.0; 1.1) | 1.3<br>(1.1; 1.4)  | 1.0<br>(0.9; 1.1) | 0.9<br>(0.7; 1.0) | 0.4<br>(0.4; 0.5)      | 1.0<br>(0.9; 1.1) | 1.7<br>(1.6; 1.8) | 1.0<br>(0.9; 1.1)                                | 1.0<br>(0.9; 1.1) | 1.1<br>(1.0; 1.2) | 1.3<br>(1.2; 1.4)    | 1.1<br>(1.0; 1.2) | 0.7<br>(0.6; 0.8)  |
| Vegetables                                            | 1.0<br>(1.0; 1.1) | 0.7<br>(0.6; 0.8)  | 1.0<br>(0.9; 1.1) | 1.4<br>(1.3; 1.4) | 1.1<br>(1.0; 1.1)      | 1.0<br>(0.9; 1.1) | 1.0<br>(0.9; 1.1) | 1.0<br>(0.9; 1.1)                                | 1.0<br>(1.0; 1.1) | 1.0<br>(0.9; 1.1) | 0.6<br>(0.5; 0.7)    | 1.0<br>(1.0; 1.1) | 1.3<br>(1.2; 1.4)  |
| Fruits                                                | 0.9<br>(0.8; 0.9) | 0.6<br>(0.5; 0.7)  | 0.9<br>(0.8; 0.9) | 1.2<br>(1.1; 1.2) | 0.9<br>(0.8; 1.0)      | 0.8<br>(0.7; 0.9) | 0.9<br>(0.8; 1.0) | 0.9<br>(0.9; 1.0)                                | 0.8<br>(0.8; 0.9) | 0.9<br>(0.8; 0.9) | 0.5<br>(0.5; 0.6)    | 0.9<br>(0.8; 0.9) | 1.1<br>(1.1; 1.2)  |
| Whole grains                                          | 0.7<br>(0.7; 0.8) | 0.3<br>(0.3; 0.4)  | 0.7<br>(0.6; 0.7) | 1.1<br>(1.0; 1.2) | 1.0<br>(0.9; 1.1)      | 0.7<br>(0.6; 0.8) | 0.4<br>(0.3; 0.5) | 0.8<br>(0.7; 0.9)                                | 0.7<br>(0.6; 0.8) | 0.7<br>(0.6; 0.8) | 0.3<br>(0.2; 0.3)    | 0.7<br>(0.6; 0.7) | 1.1<br>(1.0; 1.2)  |
| Potatoes                                              | 0.6<br>(0.6; 0.7) | 0.7<br>(0.6; 0.7)  | 0.6<br>(0.6; 0.7) | 0.6<br>(0.6; 0.7) | 0.4<br>(0.4; 0.5)      | 0.7<br>(0.6; 0.7) | 0.8<br>(0.8; 0.9) | 0.6<br>(0.6; 0.7)                                | 0.6<br>(0.6; 0.7) | 0.7<br>(0.6; 0.7) | 0.7<br>(0.6; 0.7)    | 0.7<br>(0.6; 0.7) | 0.6<br>(0.5; 0.6)  |
| Vegetable oils                                        | 0.6<br>(0.6; 0.6) | 0.4<br>(0.3; 0.4)  | 0.6<br>(0.6; 0.7) | 0.8<br>(0.7; 0.8) | 0.5<br>(0.4; 0.5)      | 0.6<br>(0.6; 0.7) | 0.7<br>(0.6; 0.7) | 0.6<br>(0.6; 0.7)                                | 0.6<br>(0.5; 0.6) | 0.6<br>(0.5; 0.6) | 0.4<br>(0.3; 0.5)    | 0.6<br>(0.5; 0.6) | 0.7<br>(0.7; 0.8)  |
| Other edible fats                                     | 0.5<br>(0.4; 0.5) | 0.5<br>(0.4; 0.6)  | 0.5<br>(0.4; 0.5) | 0.4<br>(0.3; 0.5) | 0.3<br>(0.3; 0.4)      | 0.5<br>(0.4; 0.6) | 0.5<br>(0.4; 0.6) | 0.1<br>(0.1; 0.1)                                | 0.2<br>(0.2; 0.3) | 1.1<br>(1.0; 1.2) | 0.4<br>(0.3; 0.6)    | 0.5<br>(0.4; 0.6) | 0.4<br>(0.3; 0.5)  |
| Cheese                                                | 0.4<br>(0.4; 0.4) | 0.3<br>(0.2; 0.3)  | 0.4<br>(0.4; 0.5) | 0.5<br>(0.4; 0.6) | 0.3<br>(0.2; 0.3)      | 0.4<br>(0.4; 0.4) | 0.5<br>(0.4; 0.5) | 0.4<br>(0.3; 0.4)                                | 0.4<br>(0.3; 0.4) | 0.4<br>(0.4; 0.5) | 0.3<br>(0.2; 0.4)    | 0.4<br>(0.4; 0.5) | 0.4<br>(0.4; 0.5)  |
| White meat                                            | 0.4<br>(0.4; 0.4) | 0.3<br>(0.3; 0.4)  | 0.4<br>(0.4; 0.5) | 0.5<br>(0.5; 0.5) | 0.3<br>(0.3; 0.4)      | 0.4<br>(0.4; 0.5) | 0.5<br>(0.5; 0.5) | 0.4<br>(0.3; 0.4)                                | 0.4<br>(0.4; 0.5) | 0.5<br>(0.4; 0.5) | 0.4<br>(0.3; 0.4)    | 0.4<br>(0.4; 0.5) | 0.4<br>(0.4; 0.5)  |
| Juices                                                | 0.4<br>(0.4; 0.5) | 0.2<br>(0.2; 0.3)  | 0.4<br>(0.4; 0.5) | 0.7<br>(0.6; 0.8) | 0.3<br>(0.3; 0.4)      | 0.4<br>(0.3; 0.5) | 0.6<br>(0.5; 0.7) | 0.4<br>(0.3; 0.5)                                | 0.5<br>(0.4; 0.5) | 0.5<br>(0.4; 0.5) | 0.4<br>(0.3; 0.5)    | 0.5<br>(0.4; 0.5) | 0.5<br>(0.4; 0.6)  |
| Eggs                                                  | 0.3<br>(0.3; 0.4) | 0.2<br>(0.2; 0.2)  | 0.3<br>(0.3; 0.4) | 0.5<br>(0.4; 0.5) | 0.3<br>(0.2; 0.3)      | 0.3<br>(0.3; 0.4) | 0.4<br>(0.4; 0.5) | 0.4<br>(0.3; 0.4)                                | 0.3<br>(0.3; 0.4) | 0.3<br>(0.3; 0.4) | 0.3<br>(0.2; 0.3)    | 0.3<br>(0.3; 0.4) | 0.4<br>(0.4; 0.5)  |
| Sweetened milk drinks and flavored homogenized cheese | 0.3<br>(0.3; 0.3) | 0.1<br>(0.1; 0.2)  | 0.3<br>(0.3; 0.4) | 0.4<br>(0.3; 0.5) | 0.2<br>(0.1; 0.2)      | 0.3<br>(0.2; 0.4) | 0.4<br>(0.3; 0.5) | 0.2<br>(0.1; 0.2)                                | 0.3<br>(0.2; 0.3) | 0.5<br>(0.4; 0.5) | 0.2<br>(0.2; 0.3)    | 0.3<br>(0.3; 0.4) | 0.3<br>(0.2; 0.4)  |
| Fish                                                  | 0.3<br>(0.2; 0.3) | 0.1<br>(0.1; 0.1)  | 0.2<br>(0.2; 0.3) | 0.5<br>(0.4; 0.5) | 0.3<br>(0.2; 0.3)      | 0.3<br>(0.2; 0.3) | 0.3<br>(0.2; 0.3) | 0.3<br>(0.2; 0.3)                                | 0.3<br>(0.2; 0.3) | 0.3<br>(0.2; 0.3) | 0.1<br>(0.1; 0.1)    | 0.3<br>(0.2; 0.3) | 0.4<br>(0.3; 0.5)  |
| Nuts and seeds                                        | 0.2<br>(0.2; 0.3) | 0.1<br>(0.0; 0.1)  | 0.2<br>(0.1; 0.2) | 0.4<br>(0.4; 0.5) | 0.4<br>(0.3; 0.4)      | 0.2<br>(0.1; 0.2) | 0.2<br>(0.1; 0.2) | 0.3<br>(0.2; 0.4)                                | 0.2<br>(0.2; 0.3) | 0.2<br>(0.1; 0.2) | 0.0<br>(0.0; 0.0)    | 0.2<br>(0.1; 0.2) | 0.5<br>(0.4; 0.5)  |
| Legumes                                               | 0.2<br>(0.2; 0.2) | 0.1<br>(0.1; 0.1)  | 0.2<br>(0.1; 0.2) | 0.4<br>(0.3; 0.4) | 0.2<br>(0.2; 0.3)      | 0.2<br>(0.1; 0.2) | 0.2<br>(0.2; 0.3) | 0.3<br>(0.2; 0.3)                                | 0.2<br>(0.1; 0.2) | 0.2<br>(0.1; 0.2) | 0.1<br>(0.1; 0.1)    | 0.2<br>(0.2; 0.2) | 0.3<br>(0.3; 0.4)  |
| Cereals                                               | 0.1<br>(0.1; 0.1) | 0.0<br>(0.0; 0.0)  | 0.1<br>(0.1; 0.1) | 0.2<br>(0.2; 0.3) | 0.1<br>(0.1; 0.2)      | 0.1<br>(0.1; 0.1) | 0.1<br>(0.1; 0.1) | 0.1<br>(0.0; 0.1)                                | 0.1<br>(0.1; 0.1) | 0.2<br>(0.1; 0.2) | 0.0<br>(0.0; 0.1)    | 0.1<br>(0.1; 0.1) | 0.2<br>(0.1; 0.2)  |
| Sweetened beverages and energy drinks                 | 0.1<br>(0.1; 0.1) | 0.1<br>(0.0; 0.1)  | 0.1<br>(0.1; 0.1) | 0.1<br>(0.1; 0.1) | 0.0<br>(0.0; 0.0)      | 0.0<br>(0.0; 0.1) | 0.2<br>(0.1; 0.2) | 0.1<br>(0.1; 0.2)                                | 0.1<br>(0.1; 0.1) | 0.1<br>(0.0; 0.1) | 0.1<br>(0.0; 0.1)    | 0.1<br>(0.1; 0.1) | 0.1<br>(0.0; 0.1)  |

'Polish-aMED' – 'Polish-adapted Mediterranean Diet' (range of points: 0-8), levels (in points): 'low' (0-2), 'average' (3-5), 'high' (6-8);

#the frequency consumption was expressed as a times/day after assigning the values for categories of frequency consumption as follows: 'never or almost never'=0; 'once a month or less'=0.025; 'several times a month'=0.1; 'several times a week'=0.571; 'daily'=1; 'several times a day'=2;

95%CI – 95% confidence interval.

Table S2. Potential confounders in the pooled analysis of two Polish case-control studies

| <b>Confounders</b>                                                                     | <b>Response categories</b>                                                                                               | <b>Scoring</b> |
|----------------------------------------------------------------------------------------|--------------------------------------------------------------------------------------------------------------------------|----------------|
| <b>Socioeconomic status (SES)</b><br>after combining data based on SES' single factors | low                                                                                                                      | 1              |
|                                                                                        | average                                                                                                                  | 2              |
|                                                                                        | high                                                                                                                     | 3              |
| <b>SES' single factors</b><br>Place of residence                                       | village                                                                                                                  | 1              |
|                                                                                        | town <20,000 inhabitants                                                                                                 | 2              |
|                                                                                        | town 20,000-100,000 inhabitants                                                                                          | 3              |
|                                                                                        | city >100,000 inhabitants                                                                                                | 4              |
| Educational level                                                                      | primary                                                                                                                  | 1              |
|                                                                                        | secondary                                                                                                                | 2              |
|                                                                                        | higher                                                                                                                   | 3              |
| Economic situation<br>(self-declared)                                                  | below the average                                                                                                        | 1              |
|                                                                                        | average                                                                                                                  | 2              |
|                                                                                        | above average                                                                                                            | 3              |
| <b>Physical activity at work</b><br>[39]                                               | low<br>more than 70% of working time spent sedentary or retired                                                          | 1              |
|                                                                                        | moderate<br>approx. 50% of working time spent sedentary and 50% of working time spent in an active manner                | 2              |
|                                                                                        | high<br>approx. 70% of working time spent in an active manner or physical work related to great exertion                 | 3              |
| <b>Physical activity in leisure time</b><br>[39]                                       | low<br>sedentary for most of the time, watching TV, reading books, walking 1-2 hours per week                            | 1              |
|                                                                                        | moderate<br>walking, bike riding, gymnastics, gardening, light physical activity performed 2-3 hours per week            | 2              |
|                                                                                        | high<br>bike riding, jogging, gardening, sport activities involving physical exertion performed more than 3 hours weekly | 3              |
| <b>Overall physical activity</b>                                                       | low                                                                                                                      | 1              |

|                                                                                                          |            |                                                                                                                                     |   |
|----------------------------------------------------------------------------------------------------------|------------|-------------------------------------------------------------------------------------------------------------------------------------|---|
| after combining data based on physical activity at work and physical activity in leisure time (Table S2) | moderate   |                                                                                                                                     | 2 |
|                                                                                                          | high       |                                                                                                                                     | 3 |
| <b>Abuse of alcohol</b> [6]                                                                              | no         |                                                                                                                                     | 1 |
|                                                                                                          | yes        | intake at least 1 bottle (0.5 liters) of beer or 2 glasses of wine (300ml) or 2 drinks (300ml) or 2 glasses of vodka (60ml) per day | 2 |
| <b>Current-smoker</b>                                                                                    | no         |                                                                                                                                     | 1 |
|                                                                                                          | yes        |                                                                                                                                     | 2 |
| <b>Former-smoker</b>                                                                                     | no         |                                                                                                                                     | 1 |
|                                                                                                          | yes        |                                                                                                                                     | 2 |
| <b>Smoking status</b>                                                                                    | non-smoker |                                                                                                                                     | 1 |
|                                                                                                          | smoker     | current-smoker or/ and former-smoker                                                                                                | 2 |

Table S3. Estimate the overall physical activity after combining data based on self-reported physical activity at work and physical activity in leisure time [40]

|                                   |                 | Physical activity at work |                 |             |
|-----------------------------------|-----------------|---------------------------|-----------------|-------------|
|                                   |                 | <b>low</b>                | <b>moderate</b> | <b>high</b> |
| Physical activity in leisure time | <b>low</b>      | low                       | low             | moderate    |
|                                   | <b>moderate</b> | low                       | moderate        | moderate    |
|                                   | <b>high</b>     | moderate                  | moderate        | high        |
